# Supplementary material for: Health Burden and Driving Force Changes Due to Exposure to PM2.5 and O3 from 2014 to 2060 in a Typical Industrial Province, China
Source: MDPI journal article supplement (doi:10.3390/atmos14111672), 2023-11-10
Supplement: s1 [file s1]

# Supplementary Materials: Health Burden and Driving Force Changes Due to Exposure to PM<sub>2.5</sub> and O<sub>3</sub> from 2014 to 2060 in a Typical Industrial Province, China

Chuanyong Zhu <sup>1,\*</sup>, Changtong Zhu <sup>1</sup>, Mengyi Qiu <sup>2</sup>, Yichao Gai <sup>1</sup>, Renqiang Li <sup>1</sup>, Ling Li <sup>3</sup>, Chen Wang <sup>1</sup>, Na Yang <sup>1</sup>, Baolin Wang <sup>1</sup>, Lei Sun <sup>1</sup>, Guihuan Yan <sup>3</sup> and Chongqing Xu <sup>3</sup>

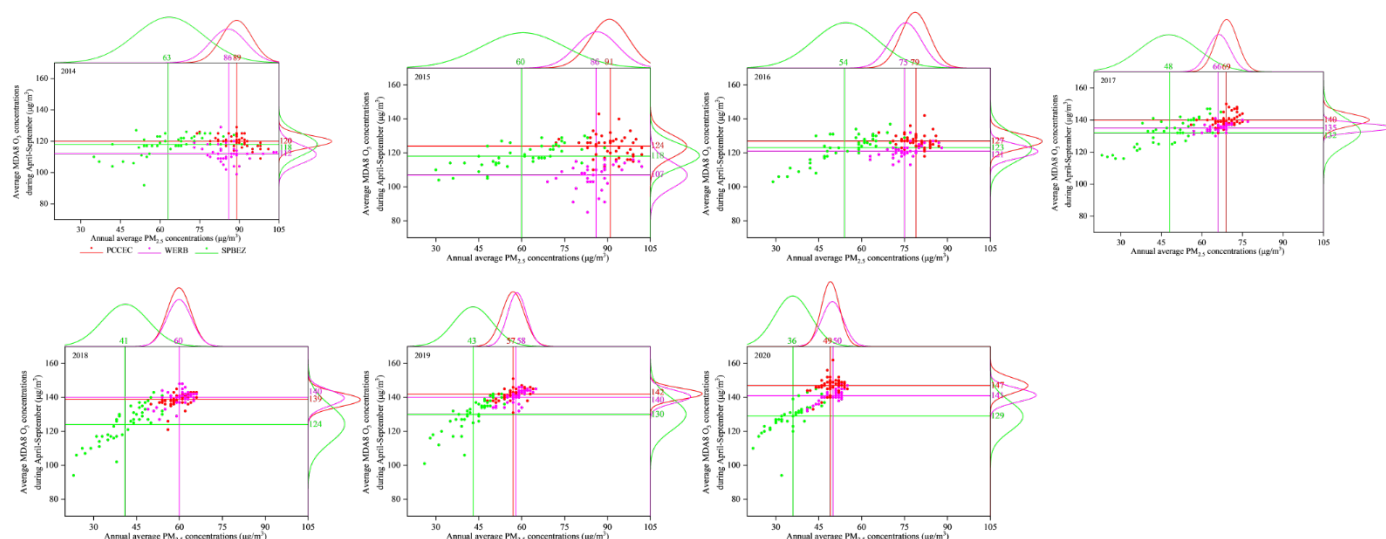

**Figure S1.** Annual April–September average MDA8 O<sub>3</sub> concentrations and annual average PM<sub>2.5</sub> concentrations for each district and county in PCCEC, WERB, and SPBEZ from 2014 to 2020.

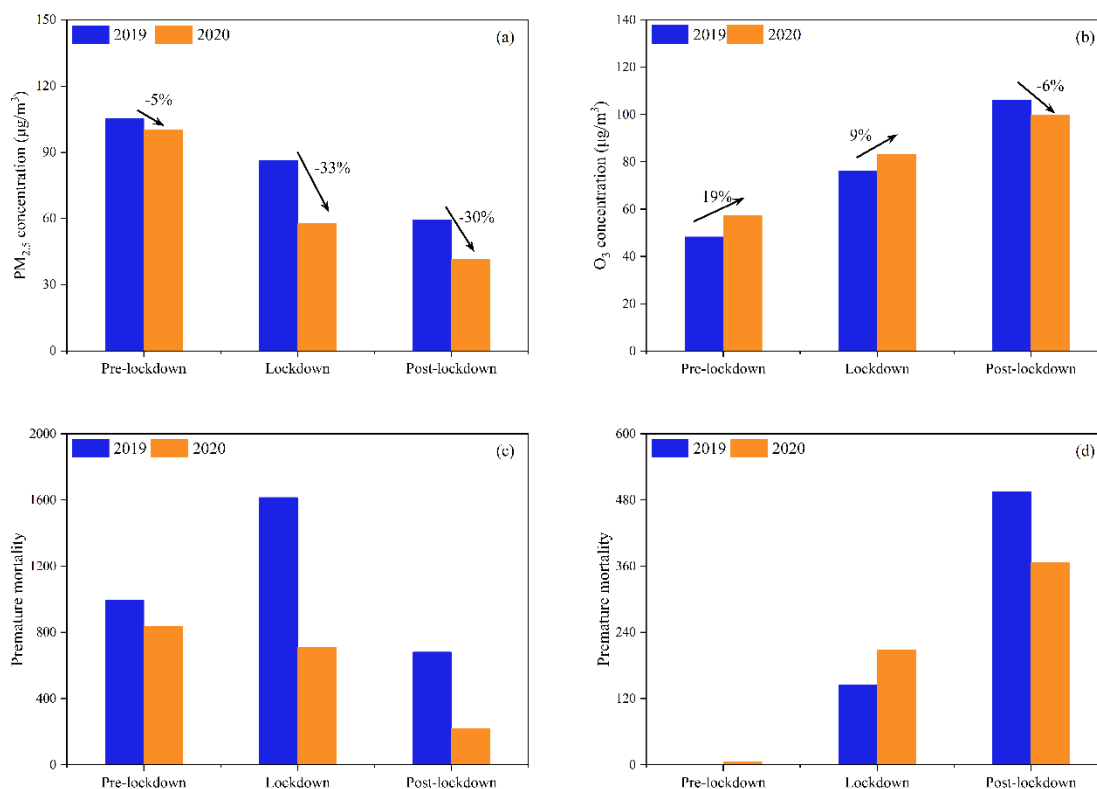

**Figure S2.** Comparative analysis of PM<sub>2.5</sub> (a) and O<sub>3</sub> (b) concentration variations in Shandong province during the Pre-lockdown (Jan. 6–Jan. 22), Lockdown (Jan. 23–Feb. 28), and Post-lockdown (Mar. 1–Mar. 31) periods in 2019 and 2020, along with the associated premature deaths due to short-term exposure to PM<sub>2.5</sub> (c) and O<sub>3</sub> (d).

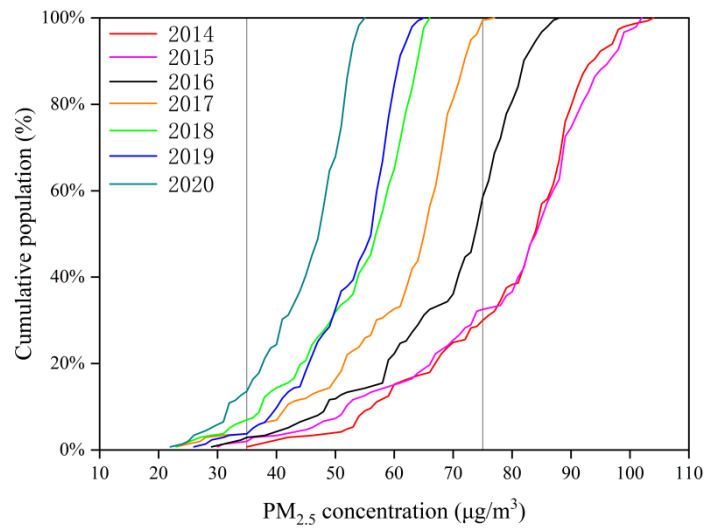

**Figure S3.** Cumulative distribution of population living under different ambient  $PM_{2.5}$  concentrations in Shandong province from 2014 to 2020.

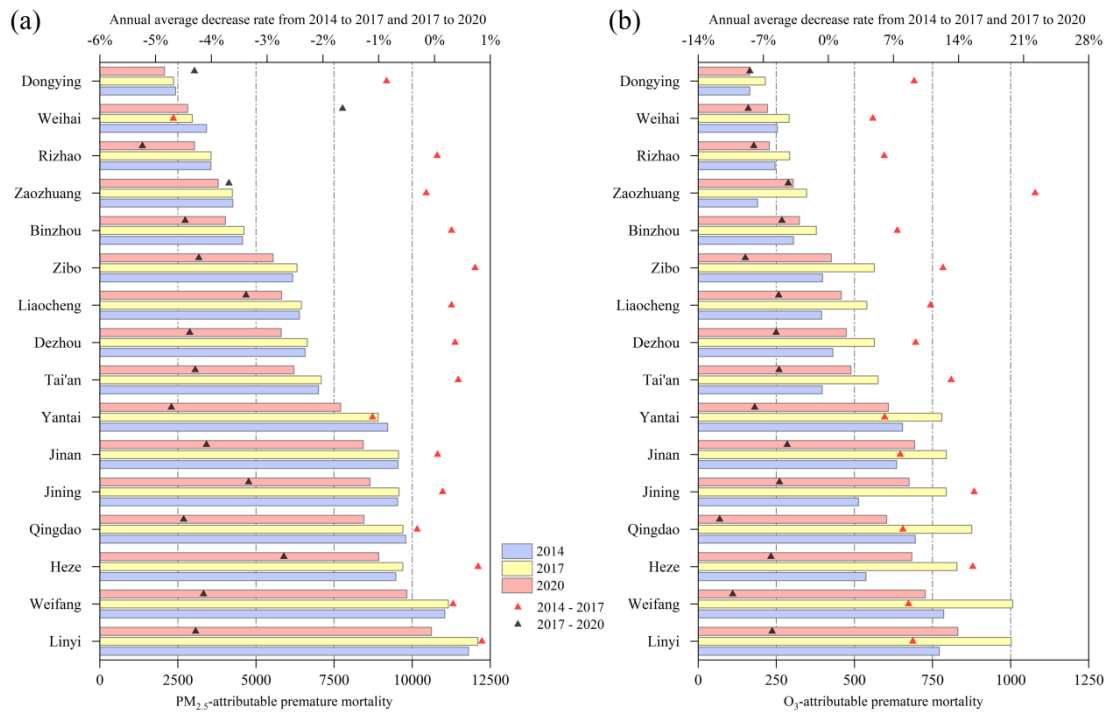

**Figure S4.** Temporal variations in premature mortality due to long-term exposure to  $PM_{2.5}$  (a) and  $O_3$  (b) in Shandong province at the city level from 2014 to 2020.

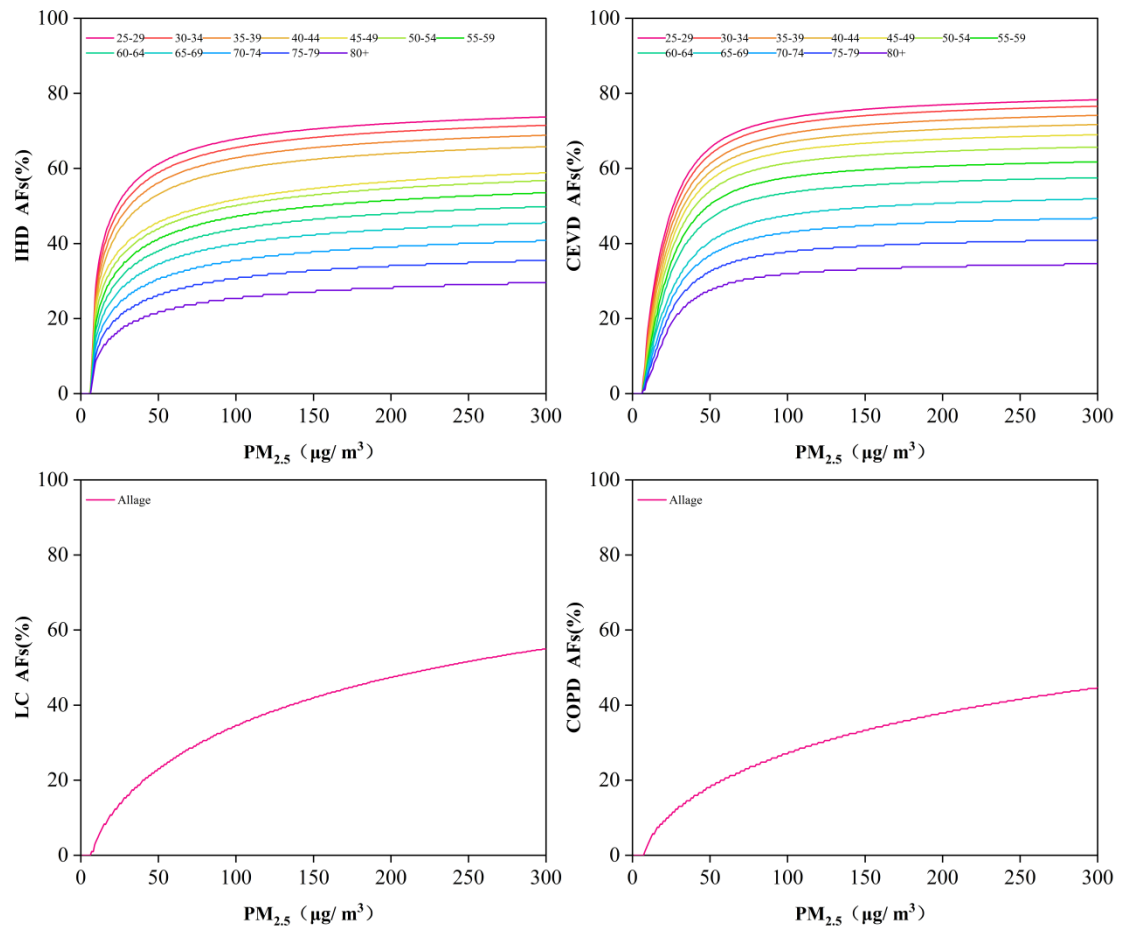

**Figure S5.** The set of AF change curves for each health endpoint at corresponding  $PM_{2.5}$  concentrations.

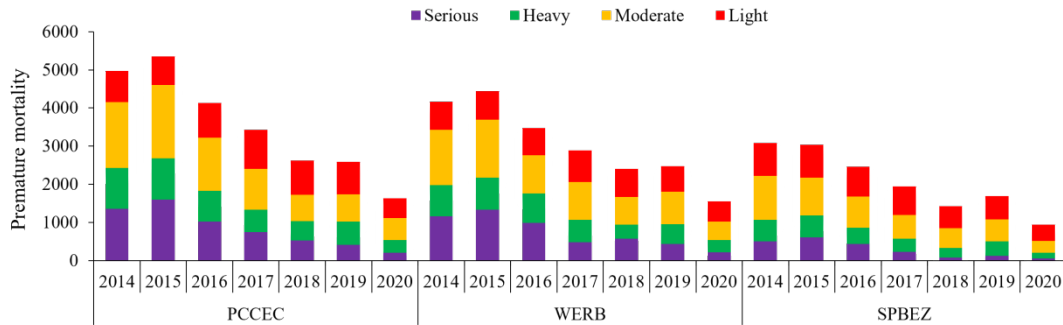

**Figure S6.** Premature mortality associated with short-term exposure to  $PM_{2.5}$  in different pollution levels in PCEEC, WERB, and SPBEZ from 2014 to 2020.

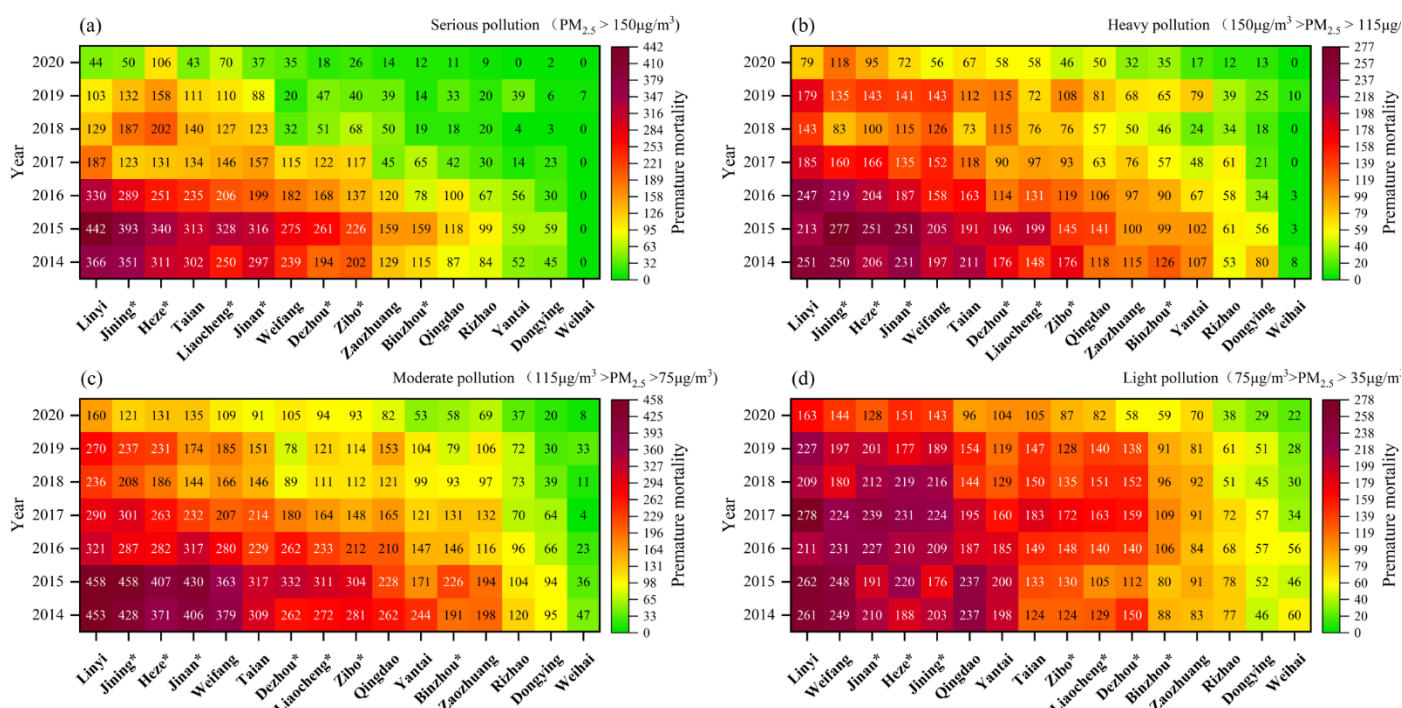

**Figure S7.** Premature mortality due to short-term exposure to PM<sub>2.5</sub> in different PM<sub>2.5</sub> pollution levels by city from 2014 to 2020.

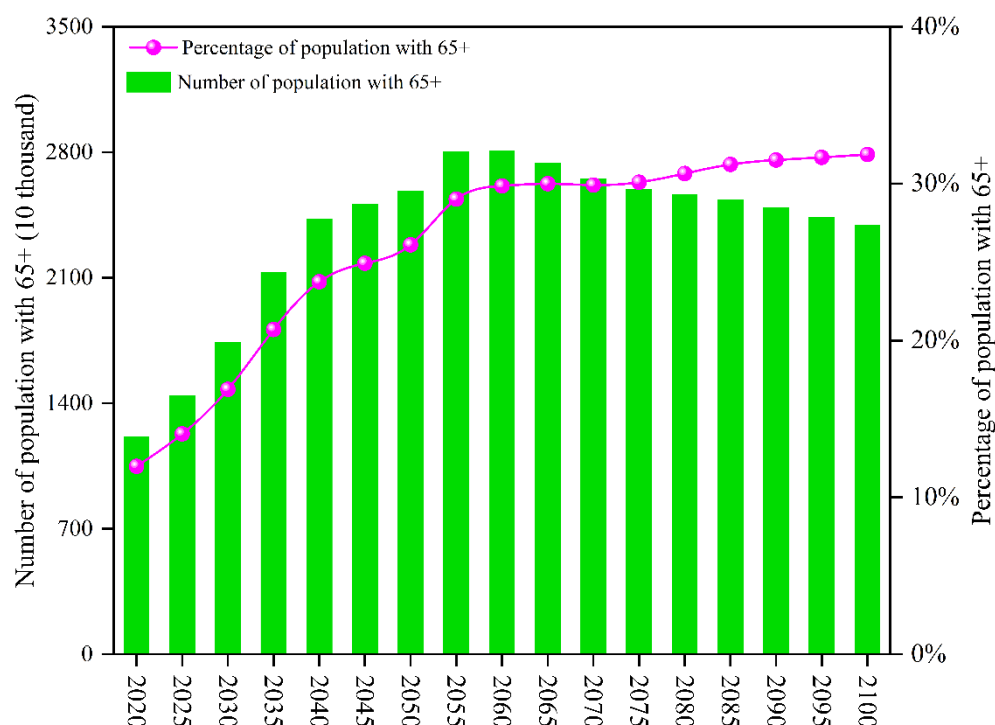

**Figure S8.** Percentage and number of the population aged 65+ in Shandong province in the future.

**Table S1.** Fitting parameters and thresholds used in the exposure–response functions.

| Exposure type | Pollutant      | Exposure–response function | Health end-points | RR                                                        | $\beta$                         | $C_0$ ( $\mu\text{g}/\text{m}^3$ ) | Reference                 |
|---------------|----------------|----------------------------|-------------------|-----------------------------------------------------------|---------------------------------|------------------------------------|---------------------------|
| Short-term    | O <sub>3</sub> | Log-linear                 | CVD               | 1.0027 (95%CI:1.001-1.0044) -10 $\mu\text{g}/\text{m}^3$  | 0.00027 (95%CI:0.0001-0.00044)  | 70                                 | (Yin et al., 2017)        |
|               |                |                            | RD                | 1.0051 (95%CI:1.0003-1.0098) -10 $\mu\text{g}/\text{m}^3$ | 0.00051 (95%CI:0.00003-0.00098) |                                    | (Madaniyazi et al., 2016) |

|           |                   |     |      |                                                   |                                    |                         |                       |
|-----------|-------------------|-----|------|---------------------------------------------------|------------------------------------|-------------------------|-----------------------|
| Long-term | PM <sub>2.5</sub> |     | CVD  | 1.0063 (95%CI:1.0035-1.0091) -10µg/m <sup>3</sup> | 0.00063 (95%CI:0.00035-0.00091)    | 35                      | (Lu et al., 2015)     |
|           |                   |     | RD   | 1.0075 (95%CI:1.0039-1.0111) -10µg/m <sup>3</sup> | 0.00075 (95%CI:0.00039-0.0011)     |                         |                       |
|           | O <sub>3</sub>    |     | COPD | 1.029 (95%CI:1.015-1.049) -10µg/m <sup>3</sup>    | 0.002913 (95%CI:0.001478-0.004766) | 70                      | (Murray et al., 2020) |
|           |                   |     |      |                                                   |                                    |                         |                       |
|           | PM <sub>2.5</sub> | IER |      | α                                                 | γ                                  | δ                       |                       |
|           |                   |     | IHD  | 0.843 (95%CI:0.86-1.2)                            | 0.0724 (95%CI:0.06-0.01)           | 0.544 (95%CI:0.43-1.16) | 6.96                  |
|           |                   |     | CEVD | 1.01 (95%CI:1.31-1.41)                            | 0.0164 (95%CI:0.02-0.03)           | 1.14 (95%CI:0.49-1.08)  | 8.38                  |
|           |                   |     | COPD | 18.3 (95%CI:5.36-75.12)                           | 0.000932 (95%CI:0.00072-0.00044)   | 0.682 (95%CI:0.85-0.63) | 7.17                  |
|           |                   |     | LC   | 159 (95%CI:19.43-23.41)                           | 0.000119 (95%CI:0.000085-0.0017)   | 0.735 (95%CI:1.02-0.67) | 7.24                  |
|           |                   |     |      |                                                   |                                    |                         |                       |

**Table S2.** Baseline mortality data of specific diseases from 2014 to 2020.

| Year | Age   | IHD<br>(Male,<br>yo/10 <sup>5</sup> ) | IHD<br>(Female,<br>yo/10 <sup>5</sup> ) | CEVD<br>(Male,<br>yo/10 <sup>5</sup> ) | CEVD<br>(Female,<br>yo/10 <sup>5</sup> ) | LC<br>(Male,<br>yo/10 <sup>5</sup> ) | LC<br>(Female,<br>yo/10 <sup>5</sup> ) | COPD<br>(Male,<br>yo/10 <sup>5</sup> ) | COPD<br>(Female,<br>yo/10 <sup>5</sup> ) | CVD<br>(Male,<br>yo/10 <sup>5</sup> ) | CVD<br>(Female,<br>yo/10 <sup>5</sup> ) | RD<br>(Male,<br>yo/10 <sup>5</sup> ) | RD<br>(Female,<br>yo/10 <sup>5</sup> ) |
|------|-------|---------------------------------------|-----------------------------------------|----------------------------------------|------------------------------------------|--------------------------------------|----------------------------------------|----------------------------------------|------------------------------------------|---------------------------------------|-----------------------------------------|--------------------------------------|----------------------------------------|
| 2014 | 25-29 | 4.14                                  | 1.44                                    | 3.74                                   | 1.06                                     | 0.87                                 | 0.71                                   | 0.27                                   | 0.32                                     | 10.73                                 | 3.86                                    | 1.27                                 | 0.99                                   |
|      | 30-34 | 8.65                                  | 2.64                                    | 8.91                                   | 2.57                                     | 2.06                                 | 1.48                                   | 0.69                                   | 0.42                                     | 21.76                                 | 7.05                                    | 2.23                                 | 1.12                                   |
|      | 35-39 | 12.37                                 | 3.57                                    | 14.06                                  | 4.13                                     | 4.01                                 | 2.72                                   | 1.16                                   | 0.71                                     | 32.2                                  | 9.89                                    | 3.17                                 | 1.35                                   |
|      | 40-44 | 25.50                                 | 7.05                                    | 29.71                                  | 10.07                                    | 11.43                                | 6.17                                   | 2.69                                   | 1.58                                     | 65.06                                 | 20.77                                   | 5.71                                 | 2.74                                   |
|      | 45-49 | 35.23                                 | 11.29                                   | 44.51                                  | 17.22                                    | 21.22                                | 10.22                                  | 5.27                                   | 2.83                                     | 92.43                                 | 34.63                                   | 9.3                                  | 4.26                                   |
|      | 50-54 | 73.02                                 | 26.06                                   | 96.64                                  | 43.82                                    | 54.99                                | 22.31                                  | 14.94                                  | 6.66                                     | 194.41                                | 81.4                                    | 23.16                                | 9.52                                   |
|      | 55-59 | 92.92                                 | 36.11                                   | 128.29                                 | 58.43                                    | 89.79                                | 30.31                                  | 26.94                                  | 10.71                                    | 252.7                                 | 111.04                                  | 37.76                                | 14.62                                  |
|      | 60-64 | 167.71                                | 88.12                                   | 252.51                                 | 132.90                                   | 169.13                               | 60.34                                  | 68.64                                  | 31.53                                    | 480.44                                | 258.27                                  | 88.58                                | 40.25                                  |
|      | 65-69 | 288.58                                | 184.09                                  | 479.71                                 | 281.08                                   | 267.42                               | 97.11                                  | 157.73                                 | 81.59                                    | 880.16                                | 541.35                                  | 194.53                               | 99.28                                  |
|      | 70-74 | 487.21                                | 353.40                                  | 811.60                                 | 512.95                                   | 372.71                               | 139.50                                 | 350.47                                 | 183.99                                   | 1503.88                               | 1013.06                                 | 424.07                               | 222.64                                 |
|      | 75-79 | 880.27                                | 726.13                                  | 1392.91                                | 962.85                                   | 472.04                               | 210.38                                 | 679.76                                 | 395.64                                   | 2636.95                               | 1976.46                                 | 833.29                               | 488.24                                 |
|      | 80-84 | 1757.66                               | 1547.77                                 | 2400.40                                | 1823.81                                  | 601.05                               | 275.34                                 | 1373.94                                | 850.88                                   | 4862.97                               | 3967.11                                 | 1733.5                               | 1076.84                                |
|      | 85+   | 4252.47                               | 4074.65                                 | 4295.39                                | 3617.77                                  | 668.56                               | 329.72                                 | 2910.65                                | 2026.48                                  | 10134.51                              | 9148.67                                 | 3972.74                              | 2810.09                                |
| 2015 | 25-29 | 4.02                                  | 1.25                                    | 3.83                                   | 1.49                                     | 0.95                                 | 0.52                                   | 0.27                                   | 0.32                                     | 10.37                                 | 3.91                                    | 1.09                                 | 0.87                                   |
|      | 30-34 | 7.78                                  | 2.48                                    | 8.43                                   | 2.26                                     | 1.96                                 | 1.31                                   | 0.77                                   | 0.51                                     | 20                                    | 6.31                                    | 1.93                                 | 1.05                                   |
|      | 35-39 | 11.85                                 | 3.20                                    | 13.13                                  | 3.81                                     | 4.12                                 | 2.34                                   | 0.92                                   | 0.74                                     | 30.1                                  | 9.03                                    | 2.53                                 | 1.13                                   |
|      | 40-44 | 23.87                                 | 6.76                                    | 27.63                                  | 9.93                                     | 10.91                                | 5.55                                   | 2.74                                   | 1.31                                     | 60.25                                 | 19.85                                   | 5.25                                 | 1.99                                   |
|      | 45-49 | 35.10                                 | 10.82                                   | 42.46                                  | 16.27                                    | 20.49                                | 9.90                                   | 5.02                                   | 2.52                                     | 88.9                                  | 32.23                                   | 8.49                                 | 3.54                                   |
|      | 50-54 | 82.10                                 | 27.16                                   | 101.54                                 | 45.67                                    | 60.48                                | 24.77                                  | 13.98                                  | 6.69                                     | 206.73                                | 84.83                                   | 21.39                                | 9.38                                   |
|      | 55-59 | 89.59                                 | 33.63                                   | 123.11                                 | 53.23                                    | 86.01                                | 29.59                                  | 24.70                                  | 10.17                                    | 240.51                                | 100.1                                   | 33.23                                | 13.23                                  |
|      | 60-64 | 173.82                                | 86.70                                   | 245.92                                 | 129.12                                   | 179.48                               | 61.80                                  | 66.57                                  | 29.74                                    | 472.67                                | 245.64                                  | 84.89                                | 37.01                                  |
|      | 65-69 | 301.75                                | 187.20                                  | 480.30                                 | 279.48                                   | 291.04                               | 104.38                                 | 160.24                                 | 75.60                                    | 882.83                                | 536.06                                  | 195.05                               | 91.56                                  |
|      | 70-74 | 490.38                                | 368.97                                  | 803.09                                 | 522.98                                   | 384.83                               | 145.93                                 | 347.12                                 | 183.50                                   | 1462.26                               | 1018.65                                 | 414.39                               | 217.63                                 |
|      | 75-79 | 886.25                                | 721.44                                  | 1364.51                                | 957.94                                   | 481.53                               | 215.44                                 | 670.94                                 | 377.29                                   | 2558.59                               | 1925.85                                 | 808.49                               | 460.88                                 |
|      | 80-84 | 1815.06                               | 1615.64                                 | 2401.86                                | 1892.90                                  | 639.16                               | 290.96                                 | 1378.00                                | 853.67                                   | 4820.28                               | 4032.59                                 | 1720.8                               | 1072.99                                |
|      | 85+   | 4583.37                               | 4524.50                                 | 4538.54                                | 3930.87                                  | 759.21                               | 354.22                                 | 3106.54                                | 2131.15                                  | 10605                                 | 9885.44                                 | 4188.07                              | 2928.74                                |
| 2016 | 25-29 | 4.22                                  | 1.34                                    | 3.78                                   | 1.55                                     | 0.82                                 | 0.47                                   | 0.27                                   | 0.19                                     | 10.82                                 | 3.95                                    | 1.19                                 | 0.77                                   |
|      | 30-34 | 8.79                                  | 2.23                                    | 8.10                                   | 2.52                                     | 2.10                                 | 1.17                                   | 0.68                                   | 0.49                                     | 20.8                                  | 6.18                                    | 1.9                                  | 1.12                                   |
|      | 35-39 | 11.80                                 | 3.13                                    | 12.18                                  | 3.41                                     | 3.66                                 | 2.24                                   | 0.91                                   | 0.63                                     | 28.23                                 | 8.28                                    | 2.5                                  | 1.18                                   |
|      | 40-44 | 23.01                                 | 5.99                                    | 25.21                                  | 7.26                                     | 8.72                                 | 5.35                                   | 2.72                                   | 1.48                                     | 56.19                                 | 16.69                                   | 5.28                                 | 2.48                                   |
|      | 45-49 | 37.00                                 | 11.29                                   | 42.15                                  | 14.04                                    | 18.63                                | 9.16                                   | 4.71                                   | 2.27                                     | 90.14                                 | 32.38                                   | 8.29                                 | 3.65                                   |
|      | 50-54 | 90.99                                 | 30.23                                   | 111.10                                 | 36.73                                    | 64.63                                | 26.36                                  | 15.98                                  | 7.23                                     | 227.98                                | 89.43                                   | 24.95                                | 10.1                                   |
|      | 55-59 | 88.96                                 | 32.19                                   | 114.51                                 | 39.47                                    | 82.60                                | 25.97                                  | 21.53                                  | 8.10                                     | 228.06                                | 91.7                                    | 30.12                                | 11.14                                  |
|      | 60-64 | 188.35                                | 91.33                                   | 259.22                                 | 108.38                                   | 191.27                               | 67.25                                  | 67.06                                  | 30.89                                    | 499.99                                | 254.3                                   | 88.2                                 | 39.29                                  |
|      | 65-69 | 296.60                                | 181.16                                  | 448.91                                 | 211.13                                   | 275.06                               | 96.78                                  | 140.48                                 | 66.70                                    | 832.59                                | 491.67                                  | 174.68                               | 82.72                                  |

|      |       |         |         |         |         |        |        |         |         |          |          |         |         |
|------|-------|---------|---------|---------|---------|--------|--------|---------|---------|----------|----------|---------|---------|
|      | 70-74 | 460.93  | 331.38  | 717.49  | 378.14  | 345.72 | 126.05 | 297.36  | 152.61  | 1317.34  | 892.55   | 356.36  | 182.39  |
|      | 75-79 | 800.98  | 653.85  | 1192.19 | 706.85  | 422.55 | 182.14 | 573.87  | 268.65  | 2242.69  | 1677     | 690.79  | 380.13  |
|      | 80-84 | 1727.49 | 1565.92 | 2244.53 | 1608.64 | 576.56 | 269.71 | 1205.61 | 739.66  | 4506.35  | 3779.2   | 1519.32 | 940     |
|      | 85+   | 4641.70 | 4554.77 | 4484.24 | 3980.83 | 737.07 | 350.11 | 2883.24 | 1990.63 | 10464.3  | 9755.22  | 3948.66 | 2756.23 |
| 2017 | 25-29 | 3.91    | 1.37    | 3.56    | 1.28    | 0.97   | 0.50   | 0.21    | 0.30    | 10.12    | 3.7      | 1.26    | 0.72    |
|      | 30-34 | 8.12    | 2.83    | 7.90    | 2.49    | 2.05   | 1.07   | 0.67    | 0.46    | 19.99    | 6.73     | 2.02    | 1.05    |
|      | 35-39 | 12.14   | 3.15    | 12.56   | 3.28    | 3.49   | 1.95   | 0.99    | 0.59    | 29.35    | 8.05     | 2.39    | 1.16    |
|      | 40-44 | 21.60   | 6.26    | 23.46   | 7.08    | 8.27   | 5.15   | 2.08    | 0.95    | 52.93    | 15.94    | 4.39    | 1.93    |
|      | 45-49 | 37.41   | 11.42   | 41.43   | 15.13   | 17.67  | 8.95   | 4.38    | 2.18    | 90.1     | 31.1     | 8.46    | 3.46    |
|      | 50-54 | 95.29   | 31.26   | 112.64  | 49.61   | 64.84  | 26.71  | 15.52   | 6.96    | 236.41   | 93.19    | 24.39   | 9.78    |
|      | 55-59 | 84.76   | 31.73   | 105.21  | 44.07   | 73.67  | 24.39  | 18.85   | 6.77    | 212.51   | 85.9     | 27.87   | 9.27    |
|      | 60-64 | 190.29  | 90.61   | 261.47  | 126.72  | 192.52 | 65.50  | 65.47   | 25.92   | 507.59   | 246.09   | 86.47   | 34.22   |
|      | 65-69 | 307.60  | 186.30  | 455.77  | 254.88  | 292.17 | 103.14 | 138.73  | 59.43   | 854.28   | 499.89   | 174.31  | 75.84   |
|      | 70-74 | 459.26  | 334.18  | 711.14  | 448.14  | 348.30 | 129.76 | 282.71  | 133.66  | 1309.86  | 882.96   | 343.01  | 163.93  |
|      | 75-79 | 786.22  | 631.25  | 1164.29 | 792.19  | 430.82 | 177.31 | 526.12  | 277.86  | 2191.36  | 1612.18  | 643.11  | 341.42  |
|      | 80-84 | 1727.91 | 1579.89 | 2167.78 | 1743.54 | 578.73 | 276.26 | 1141.89 | 681.36  | 4425.6   | 3790.21  | 1450.62 | 888.71  |
|      | 85+   | 4802.40 | 4745.74 | 4522.55 | 3899.79 | 761.26 | 373.07 | 2849.22 | 1888.29 | 10772.77 | 10027.4  | 3993.22 | 2677.21 |
| 2018 | 25-29 | 3.97    | 1.39    | 3.21    | 1.04    | 0.90   | 0.46   | 0.32    | 0.09    | 9.34     | 3.48     | 1.47    | 0.58    |
|      | 30-34 | 9.45    | 2.58    | 7.99    | 2.50    | 1.99   | 1.07   | 0.66    | 0.43    | 21.66    | 6.57     | 2.12    | 1.27    |
|      | 35-39 | 12.69   | 3.10    | 11.55   | 2.96    | 2.92   | 1.82   | 0.89    | 0.54    | 29.4     | 7.98     | 2.54    | 1.19    |
|      | 40-44 | 21.81   | 5.74    | 21.81   | 6.14    | 7.33   | 4.34   | 1.88    | 0.96    | 51.13    | 14.47    | 4.35    | 1.89    |
|      | 45-49 | 39.48   | 11.24   | 42.23   | 15.12   | 17.85  | 9.04   | 4.32    | 1.93    | 93.43    | 30.95    | 8.5     | 3.52    |
|      | 50-54 | 93.40   | 32.38   | 105.67  | 47.25   | 59.92  | 25.33  | 14.69   | 6.41    | 225.19   | 90.97    | 24.56   | 9.8     |
|      | 55-59 | 95.57   | 33.41   | 109.85  | 45.41   | 77.64  | 25.16  | 18.42   | 6.58    | 229.84   | 89.21    | 28.59   | 9.84    |
|      | 60-64 | 199.20  | 91.17   | 255.12  | 121.67  | 193.59 | 63.21  | 63.95   | 24.02   | 508.53   | 243.05   | 88.04   | 32.65   |
|      | 65-69 | 312.11  | 180.99  | 436.72  | 244.82  | 293.44 | 97.05  | 134.23  | 55.63   | 837.82   | 481.66   | 172.28  | 71.83   |
|      | 70-74 | 444.52  | 317.03  | 667.76  | 415.37  | 339.77 | 128.66 | 259.51  | 123.05  | 1243.78  | 833.37   | 319.95  | 153.15  |
|      | 75-79 | 740.46  | 587.39  | 1056.36 | 735.85  | 401.41 | 160.34 | 463.58  | 236.20  | 2019.89  | 1493.75  | 578.06  | 298.11  |
|      | 80-84 | 1653.88 | 1494.24 | 2068.03 | 1611.22 | 538.82 | 263.29 | 1044.55 | 609.29  | 4214.89  | 3538.86  | 1346.64 | 799.33  |
|      | 85+   | 5328.85 | 4733.41 | 4541.23 | 3904.34 | 762.95 | 386.64 | 2681.03 | 1751.65 | 10795.75 | 10042.09 | 3802.59 | 2523.45 |
| 2019 | 25-29 | 3.23    | 1.03    | 2.45    | 0.86    | 0.48   | 0.31   | 0.19    | 0.16    | 7.49     | 3.14     | 1.05    | 0.56    |
|      | 30-34 | 7.30    | 2.04    | 6.06    | 1.87    | 1.61   | 0.77   | 0.44    | 0.25    | 17.16    | 5.21     | 1.8     | 0.74    |
|      | 35-39 | 13.74   | 3.10    | 12.39   | 2.93    | 3.52   | 2.13   | 0.81    | 0.45    | 31.38    | 7.91     | 2.61    | 1.08    |
|      | 40-44 | 24.12   | 5.91    | 23.62   | 6.89    | 6.98   | 4.12   | 2.06    | 0.84    | 56.43    | 15.25    | 5.11    | 1.83    |
|      | 45-49 | 39.96   | 10.36   | 42.53   | 14.41   | 16.28  | 8.81   | 4.15    | 1.80    | 95.81    | 29.38    | 8.5     | 3.35    |
|      | 50-54 | 61.96   | 19.19   | 70.90   | 28.35   | 37.44  | 15.68  | 8.85    | 3.60    | 151.56   | 54.71    | 15.77   | 5.76    |
|      | 55-59 | 109.84  | 35.70   | 126.14  | 48.93   | 85.01  | 29.28  | 18.87   | 6.18    | 265.78   | 97.25    | 30.14   | 9.95    |
|      | 60-64 | 154.86  | 66.82   | 198.86  | 88.04   | 148.87 | 47.05  | 45.56   | 16.76   | 395.43   | 177.38   | 65.11   | 23.5    |
|      | 65-69 | 267.36  | 144.41  | 368.42  | 191.30  | 254.29 | 81.64  | 104.28  | 42.06   | 707.99   | 380.62   | 139.12  | 55.95   |
|      | 70-74 | 469.04  | 324.38  | 686.40  | 419.32  | 366.21 | 121.48 | 246.33  | 112.62  | 1293.14  | 843.25   | 311.47  | 143.13  |
|      | 75-79 | 896.62  | 710.47  | 1266.49 | 877.79  | 494.30 | 194.30 | 545.73  | 261.67  | 2430.19  | 1796.81  | 684.1   | 334.68  |
|      | 80-84 | 1674.46 | 1485.68 | 2087.20 | 1572.60 | 552.39 | 261.63 | 1006.70 | 550.90  | 4270.5   | 3501.56  | 1304.6  | 732.48  |
|      | 85+   | 5119.19 | 5259.02 | 4703.61 | 4312.07 | 792.27 | 400.60 | 2635.23 | 1799.72 | 11322.76 | 11190.44 | 3782.14 | 2624.83 |
| 2020 | 25-29 | 3.47    | 1.04    | 2.47    | 0.85    | 0.46   | 0.34   | 0.18    | 0.17    | 4.78     | 2.94     | 0.85    | 0.41    |
|      | 30-34 | 7.85    | 2.12    | 6.32    | 1.65    | 1.53   | 0.81   | 0.38    | 0.35    | 11.33    | 5.1      | 1.24    | 0.73    |
|      | 35-39 | 14.69   | 3.16    | 14.00   | 3.00    | 3.39   | 1.78   | 0.73    | 0.31    | 22.14    | 8.1      | 2.28    | 0.84    |
|      | 40-44 | 24.91   | 5.50    | 24.98   | 6.54    | 6.86   | 4.21   | 1.42    | 0.71    | 37.89    | 14.67    | 3.67    | 1.58    |
|      | 45-49 | 39.12   | 10.97   | 42.87   | 13.83   | 15.17  | 8.47   | 3.30    | 1.65    | 66.29    | 29.02    | 6.8     | 3.2     |
|      | 50-54 | 62.65   | 19.42   | 72.38   | 28.79   | 34.73  | 15.50  | 7.64    | 3.20    | 104.64   | 55.44    | 14      | 5.22    |
|      | 55-59 | 101.59  | 32.37   | 122.65  | 46.69   | 76.12  | 26.72  | 15.63   | 5.48    | 178      | 91.07    | 25.71   | 8.6     |
|      | 60-64 | 156.37  | 64.48   | 199.69  | 86.05   | 148.33 | 46.06  | 37.35   | 12.56   | 295.72   | 172.54   | 55.09   | 19.49   |
|      | 65-69 | 255.26  | 139.32  | 360.71  | 189.76  | 240.35 | 79.52  | 88.00   | 33.11   | 531.39   | 371.32   | 119.17  | 45.22   |
|      | 70-74 | 455.43  | 305.21  | 681.38  | 409.73  | 351.13 | 122.81 | 207.83  | 86.55   | 993.28   | 811.04   | 262.79  | 111.69  |
|      | 75-79 | 878.41  | 680.37  | 1249.74 | 827.88  | 479.88 | 184.32 | 458.78  | 204.82  | 1904.79  | 1712.8   | 569.28  | 258.49  |
|      | 80-84 | 1777.56 | 1556.05 | 2229.44 | 1656.64 | 565.16 | 262.77 | 912.25  | 469.64  | 3813.77  | 3682.32  | 1146.81 | 609.98  |
|      | 85+   | 4612.53 | 4560.48 | 4201.12 | 3593.59 | 656.05 | 332.06 | 1999.56 | 1234.44 | 9574.06  | 9542.65  | 2747.28 | 1699.73 |

**Table S3.** Annual average concentrations of PM<sub>2.5</sub> and O<sub>3</sub> in Shandong province from 2025 to 2060.

| Year   | PM <sub>2.5</sub> (μg/m <sup>3</sup> ) | O <sub>3</sub> (μg/m <sup>3</sup> ) |
|--------|----------------------------------------|-------------------------------------|
| 2025*  | 40                                     | 130                                 |
| 2030** | 27                                     | 129                                 |

|        |    |     |
|--------|----|-----|
| 2035** | 23 | 123 |
| 2060** | 11 | 93  |

\* According to the 14th Five-Year Plan, there will be a 10% reduction by 2025 relative to 2020.

\*\* From simulations by Shi et al. (2021). In combination with the carbon-neutral target Chinese CO<sub>2</sub> emission pathway (CAEP-CAP), these results take into account the application and development of end-of-pipe technologies and the "Beautiful China 2035" target.

**Table S4.** The introduction and implementation of policies related to clean air actions in Shandong province.

| Year       | Measures and Policies                                                                                                                                                                                                                                                                                                                                                                                                        |
|------------|------------------------------------------------------------------------------------------------------------------------------------------------------------------------------------------------------------------------------------------------------------------------------------------------------------------------------------------------------------------------------------------------------------------------------|
| 7/17/2013  | "2013-2020 Shandong Province Air Pollution Control Plan"; "Phase I Action Plan (2013-2015)".                                                                                                                                                                                                                                                                                                                                 |
| 9/1/2013   | Shandong Province Regional Air Pollutants Emission Standards.                                                                                                                                                                                                                                                                                                                                                                |
| 11/1/2015  | A joint prevention and control mechanism for air pollution in Shandong's capital city cluster officially launched.                                                                                                                                                                                                                                                                                                           |
| 5/19/2016  | "2013-2020 Shandong Province Air Pollution Control Plan"; "Phase I Action Plan (2015-2017)".                                                                                                                                                                                                                                                                                                                                 |
| 11/1/2016  | Shandong Province Air Pollution Prevention and Control Regulations.                                                                                                                                                                                                                                                                                                                                                          |
|            | Shandong Province "Beijing, Tianjin, Hebei and surrounding areas 2017 air pollution prevention and control work programme" implementation rules were introduced.                                                                                                                                                                                                                                                             |
| 5/25/2017  | "Opinions on Strengthening Responsibility for Eco-environmental Damage", "Assessment Measures for the Achievement of Air Pollution Prevention and Control Targets and Tasks in Shandong Province", "Programme for the Division of Responsibilities of Air Pollution Prevention and Control Departments in Shandong Province", and "Measures for Environmental Protection Talks in Shandong Province" issued and implemented. |
| 1/7/2020   | Implementation Plan for the Comprehensive Treatment of Air Pollution from Industrial Furnaces in Shandong Province.                                                                                                                                                                                                                                                                                                          |
| 11/20/2020 | Implementation Rules of Shandong Province for Implementing the Action Plan for Comprehensive Control of Air Pollution in Autumn and Winter in Beijing, Tianjin, Hebei and Neighbouring Regions and Fenwei Plain 2020-2021.                                                                                                                                                                                                   |

**Table S5.** Top 30 counties with the highest premature mortality rates due to long-term PM<sub>2.5</sub> exposure from 2014 to 2020.

| City      | Ename      | 2014 | 2015 | 2016 | 2017 | 2018 | 2019 | 2020 | 7-year total |
|-----------|------------|------|------|------|------|------|------|------|--------------|
| Qingdao   | Pingdong   | 2015 | 2146 | 2004 | 2002 | 1889 | 1964 | 1750 | 13770        |
| Zaozhuang | Tengzhou   | 1935 | 2054 | 1913 | 1903 | 1855 | 1874 | 1710 | 13244        |
| Taian     | Xintai     | 1604 | 1701 | 1586 | 1651 | 1594 | 1606 | 1423 | 11165        |
| Heze      | Caoxian    | 1485 | 1602 | 1496 | 1518 | 1492 | 1516 | 1416 | 10525        |
| Linyi     | Lanling    | 1340 | 1412 | 1327 | 1394 | 1371 | 1393 | 1283 | 9520         |
| Yantai    | Laizhou    | 1449 | 1511 | 1422 | 1442 | 1349 | 1436 | 1275 | 9884         |
| Heze      | Danxian    | 1328 | 1438 | 1350 | 1374 | 1360 | 1380 | 1274 | 9504         |
| Weifang   | Shouguang  | 1403 | 1473 | 1358 | 1440 | 1342 | 1363 | 1270 | 9649         |
| Heze      | Mudanqu    | 1349 | 1453 | 1353 | 1387 | 1362 | 1359 | 1256 | 9519         |
| Qingdao   | Shibeiqu   | 1547 | 1578 | 1498 | 1347 | 1298 | 1365 | 1233 | 9866         |
| Jining    | Zoucheng   | 1378 | 1471 | 1363 | 1378 | 1342 | 1346 | 1230 | 9508         |
| Laiwu     | Laichengqu | 1293 | 1367 | 1282 | 1411 | 1349 | 1356 | 1223 | 9281         |
| Heze      | Yuncheng   | 1291 | 1387 | 1293 | 1306 | 1285 | 1298 | 1201 | 9061         |
| Jining    | Renchengqu | 1288 | 1363 | 1274 | 1280 | 1259 | 1251 | 1176 | 8891         |
| Jinan     | Zhangqiuqu | 1329 | 1408 | 1306 | 1344 | 1279 | 1282 | 1175 | 9123         |
| Linyi     | Yishui     | 1349 | 1446 | 1357 | 1369 | 1305 | 1332 | 1167 | 9325         |
| Weifang   | Zhucheng   | 1331 | 1396 | 1305 | 1343 | 1290 | 1306 | 1164 | 9135         |
| Linyi     | Junan      | 1299 | 1370 | 1285 | 1326 | 1264 | 1287 | 1146 | 8977         |

|           |             |      |      |      |      |      |      |      |      |
|-----------|-------------|------|------|------|------|------|------|------|------|
| Taian     | Daiyuequ    | 1057 | 1094 | 1047 | 1292 | 1250 | 1253 | 1133 | 8126 |
| Qingdao   | Jimoqu      | 1245 | 1379 | 1320 | 1324 | 1245 | 1286 | 1111 | 8910 |
| Taian     | Feicheng    | 1248 | 1322 | 1230 | 1241 | 1194 | 1196 | 1094 | 8525 |
| Weifang   | Qingzhou    | 1234 | 1297 | 1208 | 1231 | 1173 | 1181 | 1094 | 8418 |
| Rizhao    | Juxian      | 1270 | 1367 | 1279 | 1291 | 1232 | 1252 | 1082 | 8773 |
| Liaocheng | Dongchangfu | 1183 | 1277 | 1183 | 1145 | 1108 | 1096 | 1036 | 8028 |
| Weifang   | Anqiu       | 1022 | 1090 | 1009 | 1172 | 1108 | 1130 | 1036 | 7567 |
| Linyi     | Pingyi      | 1171 | 1251 | 1173 | 1184 | 1130 | 1148 | 1032 | 8089 |
| Linyi     | Feixian     | 929  | 999  | 945  | 1154 | 1120 | 1135 | 1029 | 7311 |
| Yantai    | Laiyang     | 1263 | 1328 | 1245 | 1253 | 1158 | 1209 | 1015 | 8471 |
| Qingdao   | Huangdaoqu  | 1208 | 1251 | 1188 | 1166 | 1131 | 1155 | 1002 | 8101 |
| Linyi     | Yinan       | 1092 | 1180 | 1099 | 1151 | 1098 | 1133 | 991  | 7744 |

**Table S6.** Premature mortality associated with long-and short-term exposures to PM<sub>2.5</sub> (95% confidence interval (in thousand)) in Shandong province from 2014 to 2020.

| Year | Long-term exposure |               |              |              | Short-term exposure |             |
|------|--------------------|---------------|--------------|--------------|---------------------|-------------|
|      | IHD                | CEVD          | LC           | COPD         | CVD                 | RD          |
| 2014 | 33.66              | 54.22         | 12.99        | 13.94        | 7.92                | 4.3         |
|      | (23.36,45.73)      | (23.95,69.13) | (4.76,17.46) | (7.26,19.44) | (4.36,11.33)        | (2.19,6.29) |
| 2015 | 36.28              | 56.61         | 14.04        | 14.59        | 8.31                | 4.52        |
|      | (25.16,49.3)       | (24.9,72.37)  | (5.16,18.89) | (7.63,20.44) | (4.58,11.91)        | (2.31,6.6)  |
| 2016 | 36.17              | 51.94         | 12.83        | 12.51        | 6.58                | 3.5         |
|      | (25.05,49.44)      | (22.32,67.16) | (4.43,17.63) | (6.34,17.86) | (3.62,9.45)         | (1.73,5.13) |
| 2017 | 37.03              | 54.01         | 12.47        | 11.47        | 5.43                | 2.82        |
|      | (25.5,50.7)        | (22.75,70.92) | (4.08,17.41) | (5.66,16.67) | (2.97,7.8)          | (1.4,4.17)  |
| 2018 | 37.07              | 51.73         | 11.56        | 10.12        | 4.29                | 2.16        |
|      | (25.5,50.85)       | (21.28,69.18) | (3.55,16.5)  | (4.77,14.94) | (2.32,6.2)          | (1.04,3.23) |
| 2019 | 38.03              | 52.53         | 11.3         | 10.17        | 4.5                 | 2.25        |
|      | (26.08,52.34)      | (21.44,70.45) | (3.48,16.19) | (4.79,14.99) | (2.44,6.5)          | (1.11,3.38) |
| 2020 | 35.56              | 48.95         | 9.9          | 7.36         | 2.75                | 1.38        |
|      | (24.35,48.75)      | (19.6,67.47)  | (2.79,14.53) | (3.29,11.15) | (1.47,4.05)         | (0.66,2.1)  |



**Table S7.** Top 30 counties with the highest premature mortality rates due to long-term O<sub>3</sub> exposure from 2014 to 2020.

| City      | County      | 2014 | 2015 | 2016 | 2017 | 2018 | 2019 | 2020 | 7-year total |
|-----------|-------------|------|------|------|------|------|------|------|--------------|
| Qingdao   | Pingdong    | 155  | 151  | 162  | 183  | 167  | 176  | 140  | 1134         |
| Zaozhuang | Tengzhou    | 88   | 89   | 119  | 157  | 172  | 166  | 137  | 928          |
| Qingdao   | Shibeiqu    | 119  | 144  | 145  | 147  | 112  | 122  | 87   | 876          |
| Yantai    | Laizhou     | 121  | 103  | 113  | 140  | 126  | 132  | 105  | 840          |
| Weifang   | Shouguang   | 101  | 116  | 112  | 140  | 122  | 124  | 97   | 812          |
| Taian     | Xintai      | 90   | 93   | 103  | 132  | 120  | 130  | 108  | 776          |
| Heze      | Caoxian     | 85   | 86   | 102  | 132  | 125  | 134  | 105  | 769          |
| Jinan     | Zhangqiuqu  | 88   | 109  | 101  | 112  | 104  | 111  | 94   | 719          |
| Heze      | Danxian     | 78   | 79   | 95   | 119  | 118  | 123  | 101  | 713          |
| Linyi     | Lanlingxian | 86   | 59   | 87   | 117  | 124  | 124  | 101  | 698          |
| Linyi     | Yishuixian  | 92   | 91   | 98   | 115  | 99   | 111  | 89   | 695          |
| Weifang   | Zhucheng    | 88   | 93   | 101  | 112  | 100  | 112  | 87   | 693          |
| Jining    | Zoucheng    | 72   | 78   | 94   | 114  | 117  | 121  | 97   | 693          |
| Heze      | Yuncheng    | 76   | 82   | 90   | 112  | 113  | 117  | 96   | 686          |
| Heze      | Mudanqu     | 73   | 79   | 88   | 114  | 116  | 120  | 93   | 683          |
| Laiwu     | Laichengqu  | 80   | 88   | 90   | 117  | 97   | 106  | 93   | 671          |
| Linyi     | Junan       | 85   | 77   | 89   | 112  | 107  | 110  | 90   | 670          |
| Qingdao   | Jimoqu      | 89   | 100  | 98   | 105  | 90   | 99   | 81   | 662          |
| Rizhao    | Juxian      | 87   | 84   | 95   | 106  | 98   | 109  | 81   | 660          |
| Jining    | Renchengqu  | 71   | 78   | 97   | 104  | 106  | 111  | 91   | 658          |
| Weifang   | Qingzhou    | 80   | 91   | 90   | 114  | 94   | 104  | 80   | 653          |
| Yantai    | Laiyang     | 85   | 97   | 93   | 100  | 84   | 97   | 82   | 638          |
| Taian     | Feicheng    | 74   | 79   | 80   | 97   | 98   | 101  | 86   | 615          |
| Qingdao   | Huangdaoqu  | 83   | 81   | 92   | 106  | 76   | 93   | 75   | 606          |
| Weifang   | Anqiu       | 75   | 79   | 78   | 102  | 91   | 98   | 76   | 599          |
| Weifang   | Gaomi       | 78   | 78   | 83   | 97   | 88   | 96   | 76   | 596          |
| Liaocheng | Dongchangfu | 73   | 77   | 79   | 97   | 94   | 94   | 81   | 595          |
| Taian     | Daiyuequ    | 62   | 65   | 68   | 105  | 97   | 103  | 89   | 589          |
| Linyi     | Yinan       | 75   | 66   | 80   | 98   | 91   | 98   | 80   | 588          |
| Linyi     | Pingyi      | 67   | 60   | 76   | 96   | 93   | 102  | 82   | 576          |

**Table S8.** Premature mortality associated with short-term exposure to O<sub>3</sub> (95% confidence interval) in 16 cities from Shandong province from 2014 to 2020.

| City      | 2014         | 2015         | 2016         | 2017           | 2018           | 2019           | 2020           | 7-year average |
|-----------|--------------|--------------|--------------|----------------|----------------|----------------|----------------|----------------|
| Qingdao   | 368 (57,675) | 308 (38,561) | 403 (59,713) | 560 (101,995)  | 621 (120,1104) | 660 (132,1177) | 595 (115,1055) | 502 (89,897)   |
| Dezhou    | 378 (59,700) | 428 (71,762) | 449 (73,797) | 586 (112,1048) | 550 (103,979)  | 611 (117,1072) | 509 (92,921)   | 502 (90,897)   |
| Jining    | 350 (60,642) | 357 (62,645) | 431 (74,761) | 520 (96,935)   | 459 (83,821)   | 518 (99,909)   | 445 (82,790)   | 440 (79,786)   |
| Linyi     | 326 (42,579) | 355 (53,638) | 358 (50,648) | 454 (72,824)   | 463 (74,813)   | 505 (96,906)   | 504 (87,903)   | 424 (68,759)   |
| Rizhao    | 247 (37,462) | 257 (39,485) | 326 (54,574) | 450 (88,810)   | 496 (102,886)  | 538 (109,948)  | 476 (95,865)   | 399 (75,719)   |
| Weihai    | 235 (21,429) | 267 (26,484) | 337 (45,613) | 423 (79,773)   | 487 (94,859)   | 514 (106,908)  | 491 (96,887)   | 393 (67,708)   |
| Tai'an    | 331 (45,598) | 336 (47,605) | 329 (44,598) | 430 (76,774)   | 398 (64,727)   | 476 (88,859)   | 429 (74,776)   | 390 (63,705)   |
| Weifang   | 190 (32,347) | 208 (37,380) | 233 (41,417) | 338 (72,597)   | 339 (72,595)   | 380 (77,668)   | 355 (72,631)   | 292 (58,519)   |
| Binzhou   | 207 (12,391) | 246 (22,472) | 250 (17,457) | 314 (37,570)   | 311 (40,571)   | 329 (53,618)   | 318 (48,610)   | 282 (33,527)   |
| Liaocheng | 201 (21,355) | 243 (33,434) | 242 (32,436) | 321 (52,584)   | 289 (48,526)   | 348 (63,622)   | 291 (47,532)   | 276 (42,498)   |
| Dongying  | 183 (20,334) | 196 (25,372) | 211 (27,389) | 297 (52,532)   | 309 (56,560)   | 334 (65,603)   | 321 (59,587)   | 264 (43,482)   |
| Heze      | 149 (14,265) | 162 (17,294) | 168 (16,300) | 205 (29,366)   | 220 (33,388)   | 222 (35,419)   | 221 (36,405)   | 192 (26,348)   |

|           |              |              |              |              |              |              |              |              |
|-----------|--------------|--------------|--------------|--------------|--------------|--------------|--------------|--------------|
| Zibo      | 77 (9,158)   | 71 (10,142)  | 121 (15,227) | 189 (29,334) | 230 (36,412) | 225 (38,397) | 222 (35,389) | 162 (25,294) |
| Jinan     | 121 (17,220) | 124 (19,224) | 134 (20,248) | 159 (28,284) | 168 (30,302) | 196 (37,348) | 164 (29,298) | 152 (26,275) |
| Yantai    | 133 (21,246) | 133 (22,250) | 116 (15,218) | 166 (30,304) | 130 (19,243) | 164 (31,295) | 166 (27,303) | 144 (24,266) |
| Zaozhuang | 74 (6,143)   | 85 (10,161)  | 93 (12,174)  | 119 (16,220) | 119 (16,210) | 119 (16,209) | 115 (14,204) | 103 (13,189) |

**Table S9.** Driving force changes in premature mortality for each health endpoint associated with long-term exposure to PM<sub>2.5</sub> and O<sub>3</sub>, 2014-2020 (unit: thousand).

|                   | PM <sub>2.5</sub>    |                       |                     |                     | O <sub>3</sub>      |
|-------------------|----------------------|-----------------------|---------------------|---------------------|---------------------|
|                   | ΔMort,IHD            | ΔMort,CEVD            | ΔMort,LC            | ΔMort,COPD          | ΔMort,COPD          |
| 2014              | 33.7<br>(23.4,45.7)  | 54.2<br>(23.9,69.1)   | 13.0<br>(4.8,17.5)  | 13.9<br>(7.3,19.4)  | 7.4<br>(3.8,11.7)   |
| H <sub>pop</sub>  | 1.1<br>(0.7,1.6)     | 1.7<br>(0.6,2.1)      | 0.3<br>(0.06,0.4)   | 0.3<br>(0.1,0.5)    | 0.1<br>(0.05,0.3)   |
| H <sub>age</sub>  | 7.5<br>(5.2,10.4)    | 10.6<br>(4.5,13.6)    | 2.7<br>(1.1,3.6)    | 2.7<br>(1.5,3.8)    | 1.8<br>(1.1,2.6)    |
| H <sub>rate</sub> | 1.3<br>(0.4,3.5)     | -2.6<br>(-4.1,-2.4)   | 0.1<br>(-0.2,0.6)   | -4.7<br>(-6.3,-2.7) | -4.7<br>(-7.5,-2.5) |
| H <sub>exp</sub>  | -8.0<br>(-12.5,-5.2) | -14.9<br>(-17.8,-7.1) | -6.2<br>(-7.6,-2.9) | -4.9<br>(-6.2,-2.9) | 3.2<br>(1.7,5.1)    |
| 2020              | 35.6<br>(24.3,48.7)  | 48.9<br>(19.6,63.0)   | 9.9<br>(2.8,14.5)   | 18.8<br>(9.0,27.8)  | 7.9<br>(4.2,12.2)   |

## References

1. Burnett, R.T.; Pope, C.A., 3rd.; Ezzati, M.; Olives, C.; Lim, S.S.; Mehta, S.; Shin, H.H.; Singh, G.; Hubbell, B.; Brauer, M.; et al. An integrated risk function for estimating the global burden of disease attributable to ambient fine particulate matter exposure. *Environ. Health Perspect.* **2014**, *122*, 397–403.
2. Jiang, X.; Zhang, Q.; Zhao, H.; Geng, G.; Peng, L.; Guan, D.; Kan, H.; Huo, H.; Lin, J.; Brauer, M.; et al. Revealing the hidden health costs embodied in Chinese exports. *Environ. Sci. Technol.* **2015**, *49*, 4381–4388.
3. Lu, F.; Xu, D.; Cheng, Y.; Dong, S.; Guo, C.; Jiang, X.; Zheng, X. Systematic review and meta-analysis of the adverse health effects of ambient PM<sub>2.5</sub> and PM<sub>10</sub> pollution in the Chinese population. *Environ. Res.* **2015**, *136*, 196–204.
4. Madaniyazi, L.; Nagashima, T.; Guo, Y.; Pan, X.; Tong, S. Projecting ozone-related mortality in East China. *Environ. Int.* **2016**, *92–93*, 165–172.
5. Murray, C.J.L.; Aravkin, A.Y.; Zheng, P.; Abbafati, C.; Abbas, K.M.; Abbasi-Kangevari, M.; Abd-Allah, F.; Abdelalim, A.; Abdolahi, M.; Abdollahpour, I.; et al. Global burden of 87 risk factors in 204 countries and territories, 1990–2019: A systematic analysis for the Global Burden of Disease Study 2019. *Lancet* **2020**, *396*, 1223–1249.
6. Yin, P.; Chen, R.; Wang, L.; Meng, X.; Liu, C.; Niu, Y.; Lin, Z.; Liu, Y.; Liu, J.; Qi, J.; et al. Ambient Ozone Pollution and Daily Mortality: A Nationwide Study in 272 Chinese Cities. *Environ. Health Perspect.* **2017**, *125*, 117006.
